# Supplementary material for: Reliability of Two Recently Developed Procedures Assessing Biological Maturity by Ultrasound Imaging—A Pilot Study
Source: MDPI journal article supplement (doi:10.3390/children11030326), 2024-03-09
Supplement: s1 [file s1]

# Image Guide

## Reliability of two recently developed procedures assessing biological maturity by ultrasound imaging

|            |                                                                                                                       |
|------------|-----------------------------------------------------------------------------------------------------------------------|
| Position 1 | <b>Epiphysis Fibula</b><br>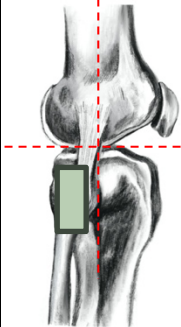         |
| Position 2 | <b>Epiphysis Tibia lateral</b><br> |
| Position 3 | <b>Epiphys Femur lateral</b><br>   |

|            |                                                                                                                               |
|------------|-------------------------------------------------------------------------------------------------------------------------------|
| Position 4 | Epiphysis <b>Tibia medial</b><br>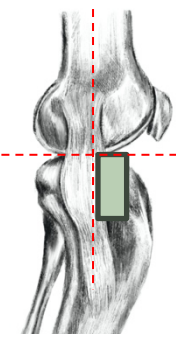            |
| Position 5 | Epiphysis <b>Femur medial</b><br>           |
| Position 6 | Ossification ratio <b>Femur medial</b><br> |

 = placement of the US-probe

References:

- 1) Own images
